# Supplementary material for: Altered patterns of fractional amplitude of low-frequency fluctuation and regional homogeneity in abstinent methamphetamine-dependent users
Source: PubMed Central journal article supplement (PMC8032776; doi:10.1038/s41598-021-87185-z), 2021-04-08
Supplement: 41598_2021_87185_MOESM1_ESM.pdf [file 41598_2021_87185_MOESM1_ESM.pdf]

# **Altered patterns of fractional amplitude of low-frequency fluctuation and regional homogeneity in abstinent methamphetamine-dependent users**

**An Xie<sup>1#</sup>, Qiuxia Wu<sup>2,3#</sup>, Winson Fu Zun Yang<sup>3</sup>, Chang Qi<sup>4</sup>, Yanhui Liao<sup>5</sup>, Xuyi Wang<sup>2</sup>, Wei Hao<sup>2</sup>, Yi-Yuan Tang<sup>3</sup>, Jianbin Liu<sup>1\*</sup>, Tieqiao Liu<sup>2\*</sup> and Jinsong Tang<sup>5</sup>**

1. Department of Radiology, Hunan Provincial People's Hospital, First Affiliated Hospital of Hunan Normal University, Changsha 410005, China.

2. National Clinical Research Center for Mental Disorders, and Department of Psychaitry, The Second Xiangya Hospital of Central South University, Changsha 410011, Hunan, China.

3. Department of Psychological Sciences, Texas Tech University, Lubbock, TX, United States.

4. Department of Psychiatry, Zhejiang Provincial People's Hospital, Department of Psychiatry, People's Hospital of Hangzhou Medical College, Hangzhou, China.

5. Department of Psychiatry, Sir Run Run Shaw Hospital, School of Medicine, Zhejiang University, Hangzhou, Zhejiang, China.

# These authors contributed equally to this manuscript

\* These authors jointly supervised this work.

Correspondence to:

Jianbin Liu, Department of Radiology, Hunan Provincial People's Hospital, First Affiliated Hospital of Hunan Normal University, Changsha 410005, China. Email: [binban24@163.com](mailto:binban24@163.com)

Tieqiao Liu, National Clinical Research Center for Mental Disorders, and Department of Psychaitry, The Second Xiangya Hospital of Central South University, Changsha 410011, Hunan, China. Email: [liutieqiao123@csu.edu.cn](mailto:liutieqiao123@csu.edu.cn)

Table S1. Other regression results

|                                                 | Natural log of duration of MA use |       | Age started using MA |       | Natural log of duration of abstinence |       |
|-------------------------------------------------|-----------------------------------|-------|----------------------|-------|---------------------------------------|-------|
|                                                 | B                                 | P     | B                    | P     | B                                     | P     |
| Regression 1: ReHo of right striatum            | -0.075                            | 0.365 | 0.001                | 0.354 | 0.023                                 | 0.759 |
| Regression 2: ReHo of left striatum             | -0.002                            | 0.087 | 0.011                | 0.092 | 0.002                                 | 0.309 |
| Regression 3: ReHo of ACC                       | 0.011                             | 0.925 | -0.011               | 0.278 | 0.009                                 | 0.933 |
| Regression 4: ReHo of right sensorimotor cortex | -0.047                            | 0.385 | -0.006               | 0.209 | -0.015                                | 0.770 |
| Regression 5: ReHo of left sensorimotor cortex  | -0.005                            | 0.926 | -0.005               | 0.273 | -0.001                                | 0.980 |
| Regression 6: ReHo of left postcentral gyrus    | 0.009                             | 0.919 | 0.001                | 0.922 | 0.091                                 | 0.261 |
| Regression 7: fALFF of left IFG*                | 0.026                             | 0.818 | 0.023                | 0.021 | 0.009                                 | 0.405 |

\*The whole regression model is not significant.
